# Supplementary material for: Gamma-Aminobutyric Acid Supplementation Boosts the Phytohormonal Profile in ‘Candidatus Liberibacter asiaticus’-Infected Citrus
Source: MDPI journal article supplement (doi:10.3390/plants12203647), 2023-10-22
Supplement: s1 [file s1]

Supplementary Materials

# Gamma-aminobutyric acid supplementation boosts the phytohormonal profile in ‘*Candidatus Liberibacter asiaticus*’-infected citrus

Yasser Nehela <sup>1,2</sup> and Nabil Killiny <sup>1</sup>

<sup>1</sup> Department of Plant Pathology, Citrus Research and Education Center, University of Florida, 700 Experiment Station Rd., Lake Alfred, FL 33850; nabilkilliny@ufl.edu (NK), yasser.nehela@agr.tanta.edu.eg (YN)

<sup>2</sup> Department of Agricultural Botany, Faculty of Agriculture, Tanta University, Tanta 31527, Egypt.

\* Correspondence: nabilkilliny@ufl.edu

**Table S1: Primers used for gene expression analysis of genes involved in salicylates biosynthesis pathway\***

| Gene          | Accession ID   |   | Primer                | Amplicon size (bp) |
|---------------|----------------|---|-----------------------|--------------------|
| <i>CsCS</i>   | XM_006485798.2 | F | ACTGGAACACCCATCCATGT  | 198                |
|               |                | R | GAAATGAAGCCATCCCAGAA  |                    |
| <i>CsCM1</i>  | XM_006482655.2 | F | GGGAGCTTGCTTGATTCTTG  | 196                |
|               |                | R | GTACGCAGCTTGATGTTGGA  |                    |
| <i>CsCM2</i>  | XM_006483415.2 | F | GCGAAAAGTCCCCACTAACA  | 202                |
|               |                | R | CTTCCTCTGGGCTGAATGTC  |                    |
| <i>CsADT1</i> | XM_006467360.2 | F | TTGGTGCCTAACAGATGTGG  | 196                |
|               |                | R | CCTTGTGAAAGCCAGAGGAC  |                    |
| <i>CsTAT</i>  | XM_006469841.1 | F | GTGGAATTTTCAGGGCTATCG | 201                |
|               |                | R | TCGAGATGGCTATGTGTTGC  |                    |
| <i>CsAST1</i> | XM_006476023.2 | F | GCTTCTCCAAGCATCTGGTC  | 201                |
|               |                | R | GTTTGAGCGGACTCCATCAT  |                    |
| <i>CsAST2</i> | XM_006476024.2 | F | GGATGTAGTGGCGCAGAGTT  | 198                |
|               |                | R | CACCACCATCAGCAACAAAC  |                    |
| <i>CsPAL</i>  | XM_006481431.2 | F | GTTCTGGCCTGGCTTCTATG  | 197                |
|               |                | R | ATAAGAGCTGCCATCGAGGA  |                    |
| <i>CsAAT</i>  | NM_001288910.1 | F | CTCGTGTTGATGTGCGTCTT  | 200                |
|               |                | R | TGGCCTCTCCGGAACATTA   |                    |
| <i>CsKAT</i>  | XM_006489736.1 | F | GGGTACAGTTTGGCACCAG   | 200                |
|               |                | R | CAGGCACAGTTTCTGAACCA  |                    |
| <i>CsICS</i>  | XM_006476586.2 | F | TGCCGGAACAGGGATAGTAG  | 197                |
|               |                | R | CTTGGTGAACTGCACAATGG  |                    |

\* The listed genes were assembled based literatures [1–3] and recent available data in national center for biotechnology information website (NCBI, <http://www.ncbi.nlm.nih.gov/gene/>).

#### Abbreviations

*CsCS*: Chorismate synthase

*CsCM1*: Chorismate mutase 1

*CsCM2*: Chorismate mutase 2

*CsADT1*: Arogenate dehydratase/prephenate dehydratase 1, chloroplastic

*CsTAT*: Tyrosine aminotransferase

*CsAST1*: Aspartate aminotransferase, cytoplasmic-like

*CsAST2*: Aspartate aminotransferase, chloroplastic-like

*CsPAL*: Phenylalanine ammonia-lyase

*CsAAT*: Alcohol acyl transferase

*CsKAT*: 3-ketoacyl-CoA thiolase 2

*CsICS*: Isochorismate synthase

**Table S2: Primers used for gene expression analysis of genes involved in auxins biosynthesis pathway\***

| Gene          | Accession ID   |   | Primer                | Amplicon size<br>(bp) |
|---------------|----------------|---|-----------------------|-----------------------|
| <i>CsASA</i>  | XM_015532734.1 | F | TTGAGCTTCAACCGGAGACT  | 199                   |
|               |                | R | ACTGAAAGTTGCTGCGGACT  |                       |
| <i>CsASB</i>  | XM_006469235.2 | F | CAATCGCACAGTTGCTCAGT  | 199                   |
|               |                | R | GCTCAGGGATTGCAGAGAGA  |                       |
| <i>CsTS</i>   | XM_006482255.1 | F | GCAGATGGAGGCTGTAGGAG  | 201                   |
|               |                | R | CCTGCGGTATCACCAAAATC  |                       |
| <i>CsTSA</i>  | XM_006470948.2 | F | TACGGAAGGAAGCCATCAAG  | 197                   |
|               |                | R | GGAGTGGTGGGACCTGTAAA  |                       |
| <i>CsTSB</i>  | XM_006493882.2 | F | GTGTTGCATGGTGCTTTGAG  | 199                   |
|               |                | R | CAGGTCCAACCTCCAGGGTAA |                       |
| <i>CsTAA2</i> | XM_015529685.1 | F | AATGGAACCTGGGTTGTCTGG | 199                   |
|               |                | R | TCATCAGGGATATGGGAAGG  |                       |
| <i>CsTAA4</i> | XM_006473060.2 | F | CGCATCTGGTTGAGTTTGTG  | 195                   |
|               |                | R | TAGAGCCAGCATGACCAGTG  |                       |
| <i>CsTDC1</i> | XM_006469752.3 | F | CGACTTTATGGCCTGGAAAA  | 206                   |
|               |                | R | GGGGTGACAACCTATCCTCA  |                       |
| <i>CsYUC2</i> | XM_006466708.2 | F | CTGGCCCTGTAATTGTTGGT  | 194                   |
|               |                | R | ACGAGGGAATGGCACATAAG  |                       |
| <i>CsYUC8</i> | XM_006480095.2 | F | CTACAGGGTACCGCAGCAAT  | 202                   |
|               |                | R | ATTTCTTTCCAGCCATGTG   |                       |
| <i>CsNIT4</i> | XM_006487697.2 | F | GTTGCTGTTTCCAGGGATTG  | 201                   |
|               |                | R | ACAGAATCCGGTGTGAGGTC  |                       |
| <i>CsAO1</i>  | XM_006487737.2 | F | GGGATCAGACAGGAATCGAA  | 240                   |
|               |                | R | CCGCCCCAAGAAGTATTGTA  |                       |

\* The listed genes were assembled based literatures [1–3] and recent available data in national center for biotechnology information website (NCBI, <http://www.ncbi.nlm.nih.gov/gene/>).

**Abbreviations:**

*CsASA*: Anthranilate synthase alpha subunit 1

*CsASB*: Anthranilate synthase beta subunit 2

*CsTS*: Tryptophan synthase-like

*CsTSA*: Tryptophan synthase alpha chain, chloroplastic-like

*CsTSB*: Tryptophan synthase beta chain 1, chloroplastic-like

*CsTAA2*: Tryptophan aminotransferase-related protein 2-like

*CsTAA4*: Tryptophan aminotransferase-related protein 4-like

*CsTDC1*: Aromatic-L-amino-acid decarboxylase-like (aka tryptophan decarboxylase)

*CsYUC2*: Indole-3-pyruvate monooxygenase YUCCA2

*CsYUC8*: Indole-3-pyruvate monooxygenase YUCCA8

*CsNIT4*: Bifunctional nitrilase/nitrile hydratase NIT4A-like

*CsAO1*: Indole-3-acetaldehyde oxidase-like (aka Acetaldehyde oxidase)

**Table S3: Primers used for gene expression analysis of genes involved in abscisic acid biosynthesis pathway\***

| Gene          | Accession ID   |   | Primer               | Amplicon size (bp) |
|---------------|----------------|---|----------------------|--------------------|
| <i>CsZEP</i>  | XM_006466537.2 | F | GCCGTTGTGCTTCTAGGTTC | 203                |
|               |                | R | CGATCACCTTAACCCGAAAA |                    |
| <i>CsVDE</i>  | NM_001288881.1 | F | AATCGCATACCAACCTGCTC | 197                |
|               |                | R | GGTTTGAAGGCAAGCAACAT |                    |
| <i>CsNSY</i>  | NM_001288932.1 | F | AACGTTGACCAAACCAGACC | 199                |
|               |                | R | CTCACTGAGCACCGAAAGTG |                    |
| <i>CsNCED</i> | NM_001288935.1 | F | ATGGCGGCAGCAACTACTAC | 199                |
|               |                | R | CTGCAGGTGATGGAGGGTAT |                    |
| <i>CsABA2</i> | NM_001288867.1 | F | GCAATCTGCTGGGCAATAGT | 203                |
|               |                | R | ATGCCAGTAGCTCCACCTGT |                    |
| <i>CsAAO3</i> | XM_006487736.2 | F | TTCCTTCAGGGGATTCTGTG | 201                |
|               |                | R | CAACCTGTTTGGGGTACCAG |                    |

\* The listed genes were assembled based literatures [1–3] and recent available data in national center for biotechnology information website (NCBI, <http://www.ncbi.nlm.nih.gov/gene/>).

**Abbreviations**

*CsZEP*: Zeaxanthin epoxidase

*CsVDE*: Violaxanthin de-epoxidase

*CsNSY*: Neoxanthin synthase

*CsNCED*: 9-*cis*-Epoxy-carotenoid dioxygenase 3

*CsABA2*: Short chain alcohol dehydrogenase

*CsAAO3*: Abscisic aldehyde oxidase

**Table S4: Primers used for gene expression analysis of genes involved in *trans*-jasmonic acid (*t*JA) biosynthesis pathway\***

| Gene          | Accession ID   |   | Primer               | Amplicon size (bp) |
|---------------|----------------|---|----------------------|--------------------|
| <i>CsFAD</i>  | XM_006480990.2 | F | CAGATCCCGCATTACCACTT | 195                |
|               |                | R | GGTATCGGTCCCGATTCTT  |                    |
| <i>CsLOX</i>  | XM_006483993.1 | F | TGGCTGTCCAAGACACTCTG | 198                |
|               |                | R | CAGCACCACATCTGCCTTTA |                    |
| <i>CsAOS</i>  | NM_001288906.1 | F | GTTTCAGCTCGCTCCGTTAC | 199                |
|               |                | R | GAGGTTGTGACACGCTTCCT |                    |
| <i>CsAOC</i>  | NW_006260521.1 | F | GCGAGTGGGAATTACAGCAG | 201                |
|               |                | R | TTAACCTGCCCACTCACTCC |                    |
| <i>CsAAE7</i> | XM_006488806.2 | F | CCACCAGAGGACACAATCCT | 201                |
|               |                | R | CTGAGCTTCGAAAGGGAGTG |                    |
| <i>CsOPR3</i> | XM_006475468.2 | F | TGCCACTTCTCTTGTGTGG  | 198                |
|               |                | R | AAATGGTAGCGTCCCTTCCT |                    |
| <i>CsACX1</i> | XM_006477083.2 | F | ACGGATCATTGAGCTTCGTC | 198                |
|               |                | R | CCCAGTGGAGATCCGTAAAA |                    |
| <i>CsAIM</i>  | XM_006488772.2 | F | TAATCCTCGTGACCCGAGAC | 203                |
|               |                | R | CTCTGCTGACGTCAAATCCA |                    |
| <i>CsKAT</i>  | XM_006480138.2 | F | ATACCTGCTGCGGTGAAGTC | 200                |
|               |                | R | AGGATCAAGCCCCAGTTTCT |                    |

\* The listed genes were assembled based literatures [1–3] and recent available data in national center for biotechnology information website (NCBI, <http://www.ncbi.nlm.nih.gov/gene/>).

#### **Abbreviations**

*CsFAD*:  $\omega$ -3 Fatty acid desaturase

*CsLOX*: Lipoxygenase

*CsAOS* : Allene oxide synthase

*CsAOC* : Allene oxide cyclase

*CsOPR3* : 12-Oxophytodienoate reductase 3

*CsAAE7*: Acetate/butyrate--CoA ligase AAE7

*CsACX1*: Acyl-coenzyme A1

*CsAIM1*: Enoyl-CoA hydratase, mitochondrial-like

*CsKAT*: 3-Ketoacyl-CoA thiolase , peroxisomal-like

**Table S5: Primers used for gene expression analysis of pathogenesis-related proteins**

| Gene                        | Function                                |   | Primer                       | Reference      |
|-----------------------------|-----------------------------------------|---|------------------------------|----------------|
| <i>CsPR1</i>                | Antifungal and antioomycetic            | F | AACTCGCCTCAAGACTACCT         | [4]            |
|                             |                                         | R | TGCAACTGTGTCGTTCCATA         |                |
| <i>CsPR2</i>                | $\beta$ -1,3-Glucanase                  | F | TTCCACTGCCATCGAAACTG         | [5]            |
|                             |                                         | R | TGTAATCTTGTTTTAAATGAGCCTCTTG |                |
| <i>CsPR3</i> <sup>a</sup>   | Chitinase, antifungal                   | F | TCCGACTACTGTGATCCTAACT       | [6]            |
|                             |                                         | R | TCTCCGCACCGTAAGTAATTG        |                |
| <i>CsPR4</i> <sup>b</sup>   | Class I, II Chitinases                  | F | AGCAAATTGGATGGGACTTG         | Newly designed |
|                             |                                         | R | CCATTGGCACACTGATCAAC         |                |
| <i>CsPR5</i>                | Thaumatococcus-like protein             | F | CACCATTGCCAATAACCCTAATG      | [7]            |
|                             |                                         | R | GGGACAGTTACCGTTAAGATCAG      | [8]            |
| <i>CsPR15</i> <sup>c</sup>  | Oxalate oxidase                         | F | TGGTTTGAGCAAAGAGGGTAATA      | [6]            |
|                             |                                         | R | AGAGTATTGAGGCCAGGAAATG       |                |
| <i>CsSTH-2</i> <sup>d</sup> | Pathogenesis-related protein STH-2-like | F | TGGAAGCGTTGAACAAATCA         | Newly designed |
|                             |                                         | R | TACAAATGCAACCTCCACCA         |                |
| <i>CsWRKY70</i>             | Activator of SA-dependent defense       | F | CTGTGCTCGGTACTACTGTTAC       | [4]            |
|                             |                                         | R | CGGCGATAGTCATCGGAATTA        |                |

<sup>a</sup> Primers were designed based on sequence *orange1.1g026315m* obtained by searching the homologous pathogenesis-related (*PR*) gene *PR-3* sequence within the citrus genome.

<sup>b</sup> Primers were designed based on sequence of pathogenesis-related protein PR-4A (GenBank XM\_006487730.3)

<sup>c</sup> Primers were designed based on sequence *30147.m014037* obtained by searching the homologous *PR* gene sequence within the citrus genome.

<sup>d</sup> Primers were designed based on sequence of pathogenesis-related protein STH-2-like (GenBank XM\_015533512.1)

---

## References

1. Itoh, H.; Izawa, T. A Study of Phytohormone Biosynthetic Gene Expression Using a Circadian Clock-Related Mutant in Rice. *Plant Signal. Behav.* **2011**, *6*, 1932–1936.
2. Lahey, K. a; Yuan, R.; Burns, J.K.; Ueng, P.P.; Timmer, L.W.; Kuang-Ren, C. Induction of Phytohormones and Differential Gene Expression in Citrus Flowers Infected by the Fungus *Colletotrichum Acutatum*. *Mol. Plant. Microbe. Interact.* **2004**, *17*, 1394–1401, doi:10.1094/MPMI.2004.17.12.1394.
3. Quecini, V.; Torres, G.A.M.M.; de Rosa, V.E.; Gimenes, M.A.; De, J.B.; De, A. V.; Benedito, V.; Targon, M.L.P.N.N.; Cristofani-Yaly, M.; Rosa Jr, V.E. de; et al. In Silico Analysis of Phytohormone Metabolism and Communication Pathways in Citrus Transcriptome. *Genet. Mol. Biol.* **2007**, *30*, 713–733, doi:10.1590/S1415-47572007000500002.
4. Dutt, M.; Barthe, G.; Irey, M.; Grosser, J. Transgenic Citrus Expressing an Arabidopsis NPR1 Gene Exhibit Enhanced Resistance against Huanglongbing (HLB; Citrus Greening). *PLoS One* **2015**, *10*, e0137134, doi:10.1371/journal.pone.0137134.
5. Francis, M.I.; Redondo, A.; Burns, J.K.; Graham, J.H. Soil Application of Imidacloprid and Related SAR-Inducing Compounds Produces Effective and Persistent Control of Citrus Canker. *Eur. J. Plant Pathol.* **2009**, *124*, 283–292, doi:10.1007/s10658-008-9415-x.
6. Hu, J.; Jiang, J.; Wang, N. Control of Citrus Huanglongbing via Trunk Injection of Plant Defense Activators and Antibiotics. *Phytopathology* **2018**, *108*, 186–195, doi:10.1094/PHYTO-05-17-0175-R.
7. Kim, J.-S.; Sagaram, U.S.; Burns, J.K.; Li, J.-L.; Wang, N. Response of Sweet Orange ( *Citrus Sinensis* ) to ‘ *Candidatus Liberibacter Asiaticus*’ Infection: Microscopy and Microarray Analyses. *Phytopathology* **2009**, *99*, 50–57, doi:10.1094/PHYTO-99-1-0050.
8. Li, J.; Pang, Z.; Trivedi, P.; Zhou, X.; Ying, X.; Jia, H.; Wang, N. “*Candidatus Liberibacter Asiaticus*” Encodes a Functional Salicylic Acid (SA) Hydroxylase That Degrades SA to Suppress Plant Defenses. *Mol. Plant-Microbe Interact.* **2017**, *30*, 620–630, doi:10.1094/MPMI-12-16-0257-R.
